# Supplementary material
Source: PubMed Central journal article supplement (PMC2723681)
Supplement: 125_2009_1413_MOESM1_ESM.pdf [file 125_2009_1413_MOESM1_ESM.pdf]

**Electronic supplementary material**

**ESM Table 1** Association of *GCK*, *GCKR*, *G6PC2* and *MTNR1B* with clinical variables in non-diabetic participants from the NHS ( $n=2361$ )

| <b>Variant</b>          | <b>FPG<br/>(mmol/l)</b> | <b>2 h<br/>glucose<br/>(mmol/l)</b> | <b>HbA<sub>1c</sub><br/>(%)</b> | <b>TG<br/>(mmol/l)</b> | <b>LDL<br/>(mmol/l)</b> | <b>HDL<br/>(mmol/l)</b> | <b>TC<br/>(mmol/l)</b> | <b>BMI<br/>(kg/m<sup>2</sup>)</b> | <b>WHR</b>   |
|-------------------------|-------------------------|-------------------------------------|---------------------------------|------------------------|-------------------------|-------------------------|------------------------|-----------------------------------|--------------|
| <i>GCK</i> (rs1799884)  |                         |                                     |                                 |                        |                         |                         |                        |                                   |              |
| GG                      | 5.39 (0.01)             | 5.37 (0.04)                         | 5.34 (0.01)                     | 1.39 (0.02)            | 3.31 (0.02)             | 1.53 (0.01)             | 5.45 (0.03)            | 25.97 (0.10)                      | 0.89 (0.001) |
| GA                      | 5.45 (0.02)             | 5.49 (0.06)                         | 5.40 (0.01)                     | 1.39 (0.03)            | 3.36 (0.04)             | 1.51 (0.02)             | 5.50 (0.04)            | 25.91 (0.15)                      | 0.89 (0.002) |
| AA                      | 5.47 (0.05)             | 5.68 (0.18)                         | 5.44 (0.03)                     | 1.31 (0.09)            | 3.29 (0.11)             | 1.48 (0.05)             | 5.36 (0.12)            | 25.89 (0.47)                      | 0.89 (0.006) |
| <i>p</i> value          | 0.001                   | 0.06                                | $5 \times 10^{-8}$              | 0.86 <sup>a</sup>      | 0.39                    | 0.46                    | 0.40                   | 0.94                              | 0.79         |
| <i>GCKR</i> (rs1260326) |                         |                                     |                                 |                        |                         |                         |                        |                                   |              |
| TT                      | 5.35 (0.03)             | 5.40 (0.08)                         | 5.33 (0.02)                     | 1.56 (0.05)            | 3.33 (0.05)             | 1.52 (0.02)             | 5.54(0.06)             | 25.85 (0.23)                      | 0.89 (0.003) |
| TC                      | 5.39 (0.01)             | 5.36 (0.04)                         | 5.35 (0.01)                     | 1.39 (0.02)            | 3.32 (0.03)             | 1.52 (0.01)             | 5.46 (0.03)            | 25.78 (0.12)                      | 0.89 (0.002) |
| CC                      | 5.38 (0.01)             | 5.19 (0.04)                         | 5.35 (0.01)                     | 1.30 (0.02)            | 3.35 (0.03)             | 1.54 (0.01)             | 5.47 (0.03)            | 25.94 (0.12)                      | 0.89 (0.002) |
| <i>p</i> value          | 0.23                    | 0.008                               | 0.50                            | $9 \times 10^{-7a}$    | 0.76                    | 0.37                    | 0.53                   | 0.66                              | 0.63         |
| <i>G6PC2</i> (rs560887) |                         |                                     |                                 |                        |                         |                         |                        |                                   |              |
| AA                      | 5.32 (0.03)             | 5.42 (0.09)                         | 5.30 (0.02)                     | 1.33 (0.05)            | 3.23 (0.06)             | 1.57 (0.03)             | 5.39 (0.07)            | 25.87 (0.26)                      | 0.89 (0.004) |
| AG                      | 5.36 (0.01)             | 5.34 (0.05)                         | 5.34 (0.01)                     | 1.37 (0.03)            | 3.31 (0.03)             | 1.51 (0.01)             | 5.44 (0.03)            | 25.93 (0.12)                      | 0.89 (0.002) |

| <b>Variant</b>             | <b>FPG<br/>(mmol/l)</b> | <b>2 h<br/>glucose<br/>(mmol/l)</b> | <b>HbA<sub>1c</sub><br/>(%)</b> | <b>TG<br/>(mmol/l)</b> | <b>LDL<br/>(mmol/l)</b> | <b>HDL<br/>(mmol/l)</b> | <b>TC<br/>(mmol/l)</b> | <b>BMI<br/>(kg/m<sup>2</sup>)</b> | <b>WHR</b>   |
|----------------------------|-------------------------|-------------------------------------|---------------------------------|------------------------|-------------------------|-------------------------|------------------------|-----------------------------------|--------------|
| GG                         | 5.43 (0.01)             | 5.33 (0.04)                         | 5.37 (0.01)                     | 1.39 (0.02)            | 3.36 (0.03)             | 1.52 (0.01)             | 5.50 (0.03)            | 25.87 (0.12)                      | 0.89 (0.002) |
| <i>p</i> value             | 5×10 <sup>-6</sup>      | 0.67                                | 3×10 <sup>-5</sup>              | 0.30 <sup>a</sup>      | 0.12                    | 0.18                    | 0.18                   | 0.93                              | 0.99         |
| <i>MTNR1B</i> (rs10830963) |                         |                                     |                                 |                        |                         |                         |                        |                                   |              |
| CC                         | 5.37 (0.01)             | 5.40 (0.04)                         | 5.35 (0.01)                     | 1.38 (0.02)            | 3.34 (0.03)             | 1.52 (0.01)             | 5.48 (0.03)            | 25.88 (0.11)                      | 0.89 (0.001) |
| CG                         | 5.44 (0.01)             | 5.38 (0.05)                         | 5.37 (0.01)                     | 1.38 (0.03)            | 3.28 (0.03)             | 1.54 (0.01)             | 5.43 (0.03)            | 25.93 (0.13)                      | 0.89 (0.002) |
| GG                         | 5.52 (0.04)             | 5.50 (0.12)                         | 5.40 (0.02)                     | 1.45 (0.07)            | 3.34 (0.08)             | 1.48 (0.03)             | 5.47 (0.08)            | 26.63 (0.33)                      | 0.89 (0.004) |
| <i>p</i> value             | 7×10 <sup>-8</sup>      | 0.62                                | 0.01                            | 0.26 <sup>a</sup>      | 0.29                    | 0.27                    | 0.54                   | 0.09                              | 0.82         |

Association of fasting plasma glucose (FPG), 2 h glucose (2hrG), HbA<sub>1c</sub>, triacylglycerol (TG), LDL, HDL, total cholesterol (TC), BMI and waist:hip ratio (WHR) with SNPs in *GCK*, *GCKR*, *G6PC2* and *MTNR1B*

Data are estimated means, adjusted for age, sex and BMI and SDs are given

The *p* values are calculated with log<sub>10</sub>-transformed triacylglycerol values

<sup>a</sup>Non-transformed values are shown
