# Supplementary material
Source: PubMed Central journal article supplement (PMC2723681)
Supplement: 125_2009_1413_MOESM2_ESM.pdf [file 125_2009_1413_MOESM2_ESM.pdf]

**Electronic supplementary material**

**ESM Table 2** Genotyping results of the independent SNPs in 2,041 controls and 2,628 cases

| SNP        | Gene          | Risk allele | Allele frequency risk allele (AA, AB, BB) |                                | OR T2D (95% CI)  | p value |
|------------|---------------|-------------|-------------------------------------------|--------------------------------|------------------|---------|
|            |               |             | Controls (n)                              | Cases (n)                      |                  |         |
| rs1799884  | <i>GCK</i>    | A           | 16.8 (641)<br>1326, 531, 55               | 18.4 (917)<br>1668, 743, 87    | 1.12 (1.00–1.25) | 0.06    |
| rs1260326  | <i>GCKR</i>   | C           | 65.8 (2562)<br>235, 864, 848              | 64.2 (3232)<br>313, 1174, 1029 | 0.94 (0.86–1.02) | 0.13    |
| rs560887   | <i>G6PC2</i>  | G           | 69.6 (2750)<br>192, 816, 967              | 68.6 (3502)<br>263, 1074, 1214 | 0.96 (0.87–1.05) | 0.32    |
| rs10830963 | <i>MTNR1B</i> | G           | 25.0 (994)<br>1111, 764, 115              | 27.1 (1377)<br>1343, 1011, 183 | 1.12 (1.02–1.23) | 0.02    |

Allele frequencies (counts) and genotype counts (AA, AB, BB) are shown

B represents the risk allele

T2D, type 2 diabetes
