# Supplementary material
Source: PubMed Central journal article supplement (PMC2723681)
Supplement: 125_2009_1413_MOESM3_ESM.pdf [file 125_2009_1413_MOESM3_ESM.pdf]

## Electronic supplementary material

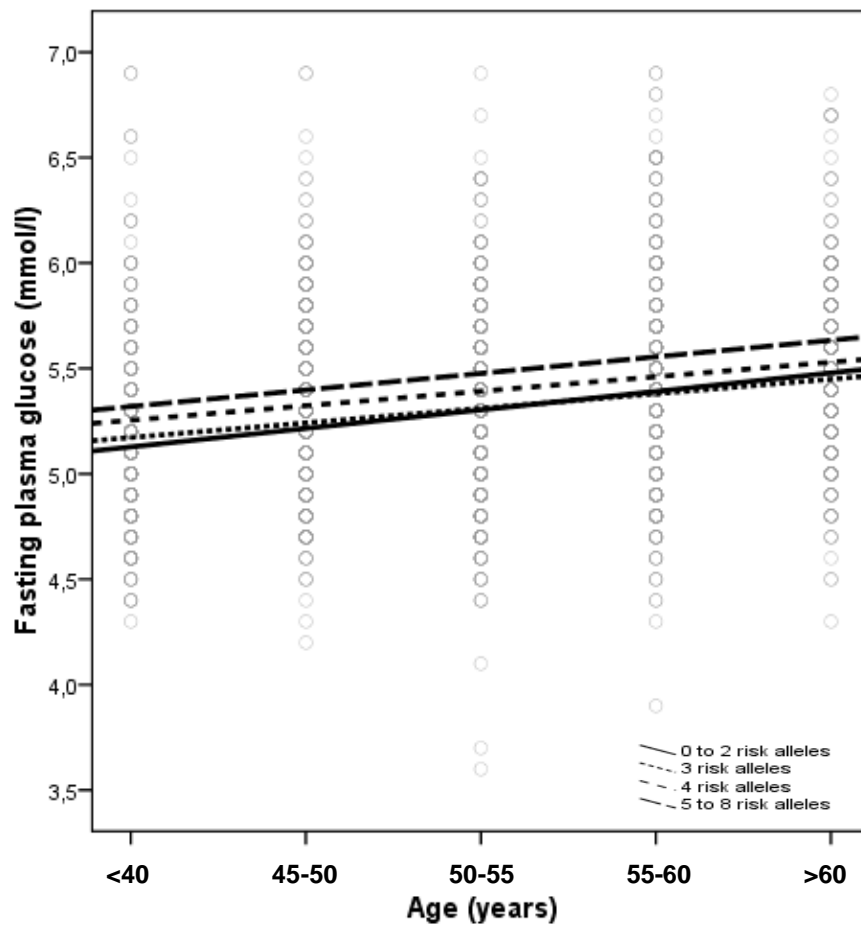

**ESM Fig. 1** Age-related increase in FPG in non-diabetic participants. For ease of interpretation we have divided the non-diabetic participants into four groups depending on the number of risk alleles. Group 1, 0–2 risk alleles; group 2, 3 risk alleles; group 3, 4 risk alleles; group 4, 5–8 risk alleles. Unadjusted trend lines for each group are shown. Values of  $\beta$  with (95% CI) are calculated with linear regression adjusted for sex and BMI. Group 1,  $\beta=0.013$  (0.007–0.019); group 2,  $\beta=0.011$  (0.006–0.016); group 3,  $\beta=0.011$  (0.007–0.016); group 4,  $\beta=0.013$  (0.007–0.019);  $p<1.0\times 10^{-4}$  for all
